# Supplementary material for: Cryo-EM structure of the spinach chloroplast ribosome reveals the location of plastid-specific ribosomal proteins and extensions
Source: PubMed Central journal article supplement — Nucleic Acids Res. 2016 Dec 16;45(5):2887–96. doi: 10.1093/nar/gkw1272 (PMC5389730; doi:10.1093/nar/gkw1272), 2016-12-16
Supplement: gkw1272_Supp.pdf [file gkw1272_Supp.pdf]

## SUPPLEMENTARY ONLINE MATERIALS

for

### **Cryo-EM structure of the spinach chloroplast ribosome reveals the location of plastid-specific ribosomal proteins and extensions**

Michael Graf<sup>1</sup>, Stefan Arenz<sup>1</sup>, Paul Huter<sup>1</sup>, Alexandra Dönhöfer<sup>1</sup>, Jiří Nováček<sup>2</sup>, Daniel N. Wilson<sup>1,3,\*</sup>

<sup>1</sup> Gene Center, Department for Biochemistry and Center for integrated Protein Science Munich (CiPSM), University of Munich, 81377 Munich, Germany

<sup>2</sup> Central European Institute of Technology (CEITEC), Masaryk University, Kamenice 5, 62500 Brno, Czech Republic.

<sup>3</sup> Department of Biochemistry and Molecular Biology, University of Hamburg, 20146 Hamburg, Germany.

\* To whom correspondence should be addressed. Tel: +49 89 2180 76903; Fax: +49 89 2180 76945; Email: wilson@lmb.uni-muenchen.de.

## SUPPLEMENTARY FIGURES

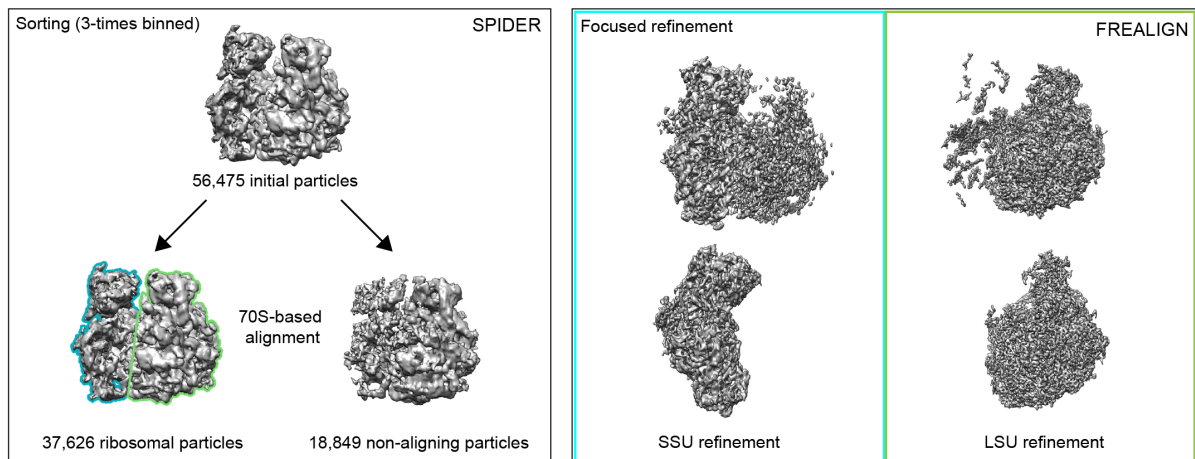

**Figure S1: *In silico* sorting and refinement of the chloroplast SSU and LSU. (A)** *In silico* sorting was performed using SPIDER (2), starting with an initial 56,475 particles that yielded after removal of non-aligning particles (18,849), a dataset of 37,626 ribosomal particles. **(B)** Subsequently, focused alignment and refinement of the SSU and LSU was performed in FREALIGN (3).

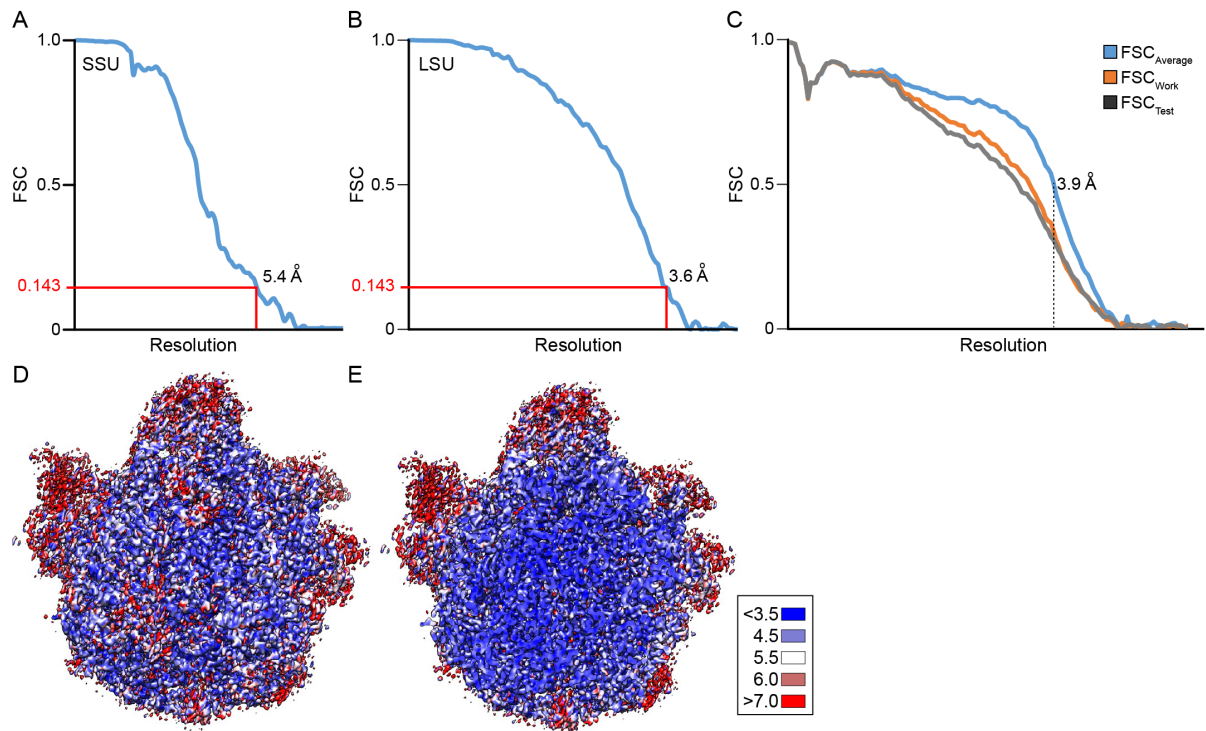

**Figure S2: Resolution of the cryo-EM reconstruction of the chloroplast SSU and LSU.** (A,B) Fourier-shell correlation curve (FSC) of the refined final map of the chloroplast (A) SSU and (B) LSU, indicating the average resolution is 5.4 Å and 3.6 Å, respectively. (C) Fit of models to maps. FSC curves calculated between the refined model and the final map (blue), with the self- and cross-validated correlations in orange and black, respectively. Information beyond 3.6 Å was not used during refinement and preserved for validation. (D) Overview and (E) transverse section through the chloroplast LSU colored according to the local resolution as calculated using ResMap (1).

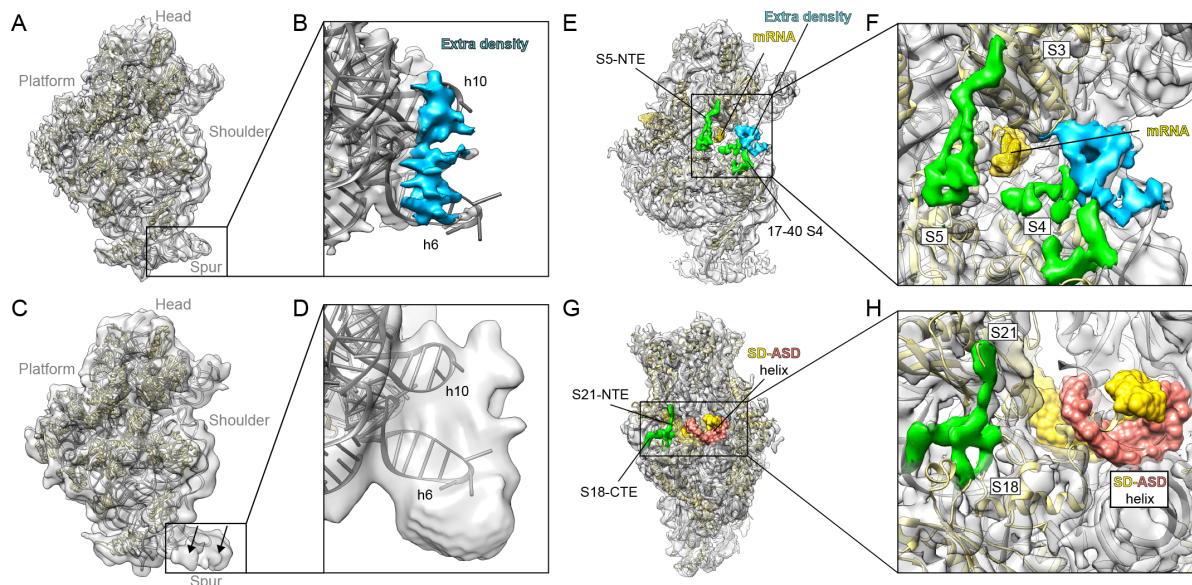

**Figure S3: Localization of extra density on the SSU.** (A) Overview of the back of the cryo-EM map (grey) of the chloroplast SSU with molecular model (rRNA, grey; RPs, yellow), and with (B) zoom onto the spur region, showing extra density (blue). (C) Overview of the back of the cryo-EM map (grey) of the chloroplast SSU from Sharma and coworkers (4) with molecular model (rRNA, grey; RPs, yellow), and with (D) zoom onto the spur region, showing additional density that was assigned to PSRP2/3. (E) Overview and (F) zoom onto the back of the cryo-EM map (grey) of the chloroplast SSU with molecular model (rRNA, grey; RPs, yellow), with cpRP densities (green) and unassigned extra density (blue) shown relative to the position of mRNA (yellow; superimposed from PDB ID 318G (5)). (G) Overview and (H) zoom onto the platform of the cryo-EM map (grey) of the chloroplast SSU with molecular model (rRNA, grey; RPs, yellow) and cpRP densities (green) shown relative to the position of SD-aSD helix (yellow/red; superimposed from PDB ID 318G (5)).

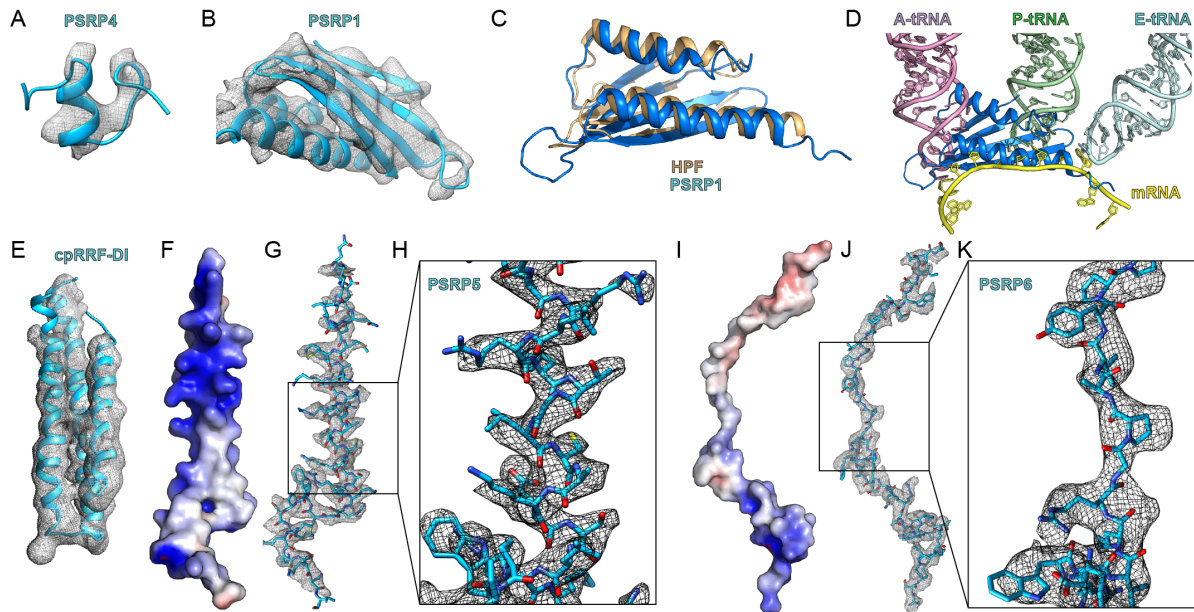

**Figure S4: Localization of PSRPs on the chlororibosome.** (A,B) Cryo-EM electron density (grey mesh) for (A) PSRP4 and (B) PSRP1. (C,D) Superimposition of the binding site of PSRP1 (blue) on the chlororibosome relative to (C) *E. coli* HPF (orange) bound to the *Thermus thermophilus* 70S ribosome (PDB ID 4V8H, (6)) and (D) mRNA (yellow) and A-site (pink), P-site (green) and E-site (cyan) tRNAs (PDB ID 3I8G, (5)). (E) Cryo-EM electron density (grey mesh) for domain I of the cpRRF (blue, cpRRF-DI). (F-H) Molecular model for PSRP5 shown as (F) surface charge (blue, positive) and (G) with electron density (grey mesh) and (H) zoom of the boxed region in (G). (I-K) Molecular model for PSRP6 shown as (I) surface charge (blue, positive, white neutral, red, negative) and (J) with electron density (grey mesh) and (K) zoom of the boxed region in (J).

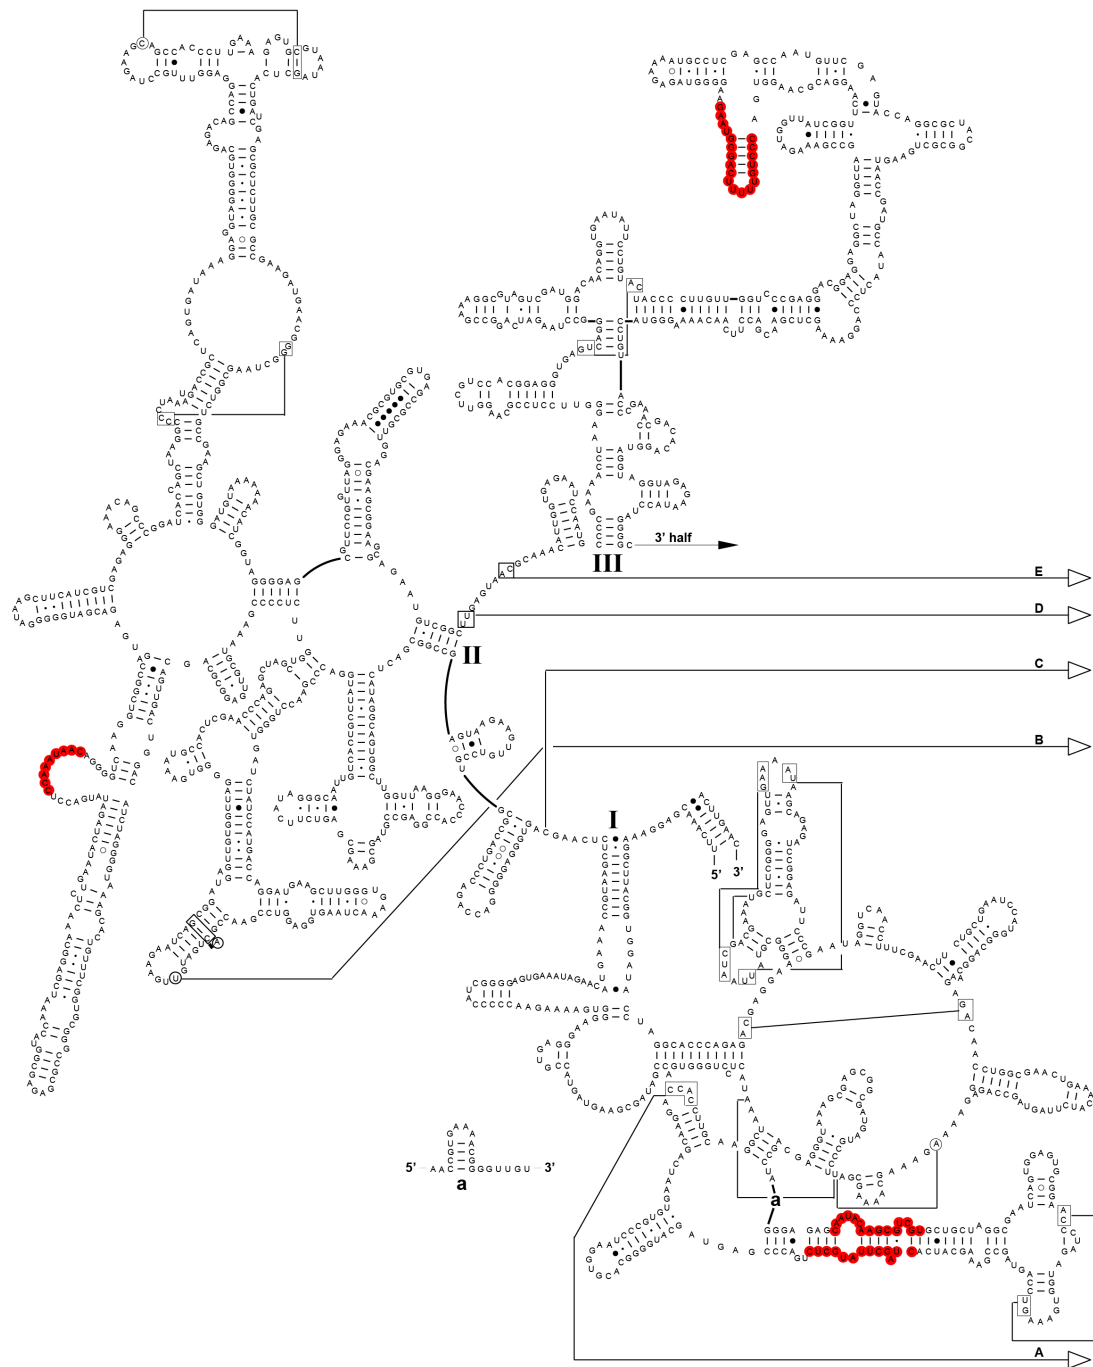

**Figure S5: Modelled nucleotides of the chloroplast 4.8S and 23S rRNAs. (A)** Secondary structure of the 5' portion of the cp23S rRNA, with nucleotides highlighted in red that were not modelled. The secondary structure diagram was taken from the Comparative RNA Web (CRW) Site ([www.rna.cccb.utexas.edu](http://www.rna.cccb.utexas.edu)) (7).

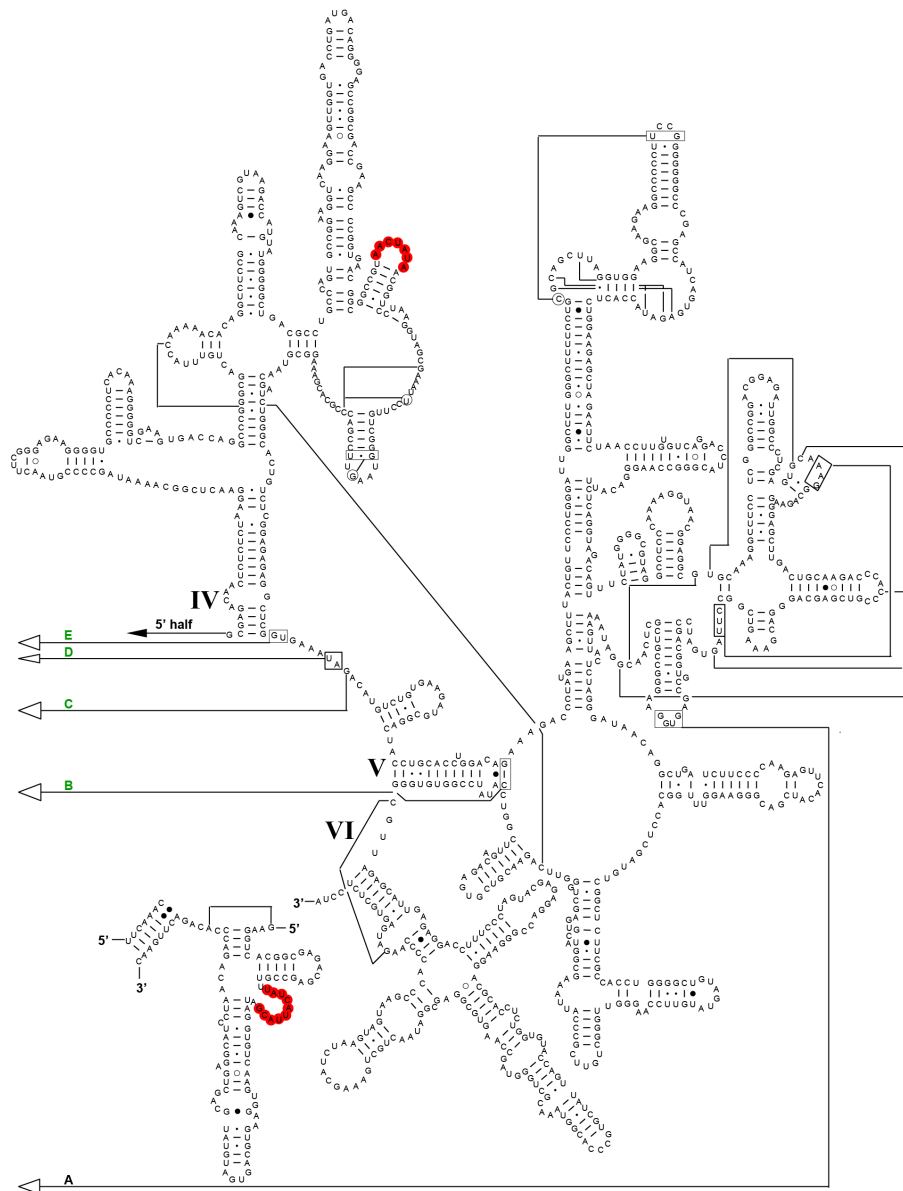

**Figure S5: Modelled nucleotides of the chloroplast 4.8S and 23S rRNAs. (B)** Secondary structure of the 3' portion of the cp23S rRNA and 4.8S rRNA, with nucleotides highlighted in red that were not modelled. The secondary structure diagram was taken from the Comparative RNA Web (CRW) Site ([www.rna.ccbb.utexas.edu](http://www.rna.ccbb.utexas.edu)) (7).

## SUPPLEMENTARY TABLES

### Supplementary Table S1. Data collection and refinement statistics

| Data Collection and Refinement                   | Cp50S                                     |
|--------------------------------------------------|-------------------------------------------|
| Particles                                        | 37,636                                    |
| Pixel size (Å)                                   | 1.061                                     |
| Defocus range (µm)                               | -1.0-2.3                                  |
| Voltage (kV)                                     | 300                                       |
| Electron dose (e <sup>-</sup> /Å <sup>-2</sup> ) | 40.3                                      |
| Map sharpening B factor (Å <sup>2</sup> )        | -84.98                                    |
| Resolution (Å, 0.143 FSC)                        | 3.6                                       |
| FSC <sub>Average</sub>                           | 0.88                                      |
| <b>Model Composition</b>                         |                                           |
| Protein residues                                 | 3,392                                     |
| RNA bases                                        | 2,963                                     |
| <b>Validation (proteins)</b>                     |                                           |
| Poor rotamers (%)                                | 7.11                                      |
| Ramachandran outliers (%)                        | 2.94                                      |
| Ramachandran favored (%)                         | 85.51                                     |
| Bad backbone bonds (%)                           | 0.04                                      |
| Bad backbone angles                              | 0.01                                      |
| MolProbity score                                 | 2.48 (99 <sup>th</sup> percentile)        |
| <b>Validation (nucleic acids)</b>                |                                           |
| Correct sugar puckers (%)                        | 96.39                                     |
| Good backbone conformations (%)                  | 69.83                                     |
| Bad bonds (%)                                    | 0.01                                      |
| Bad angles                                       | 0.21                                      |
| <b>Clash score, all atoms</b>                    | <b>3.96 (100<sup>th</sup> percentile)</b> |



## Supplementary Table S2 Modeled proteins of the chloroplast LSU

| Protein | UniProtKB  | Preprotein | Mature Length | Modeled Residues |
|---------|------------|------------|---------------|------------------|
| uL01c   | Q9LE95     | 1-352      | 73-352        |                  |
| uL02c   | P06509     |            | 2-272         | 26-271           |
| uL03c   | AOA0K9QEC7 | 1-305      | 85-305        | 85-303           |
| uL04c   | O49937     | 1-293      | 51-293        | 56-260           |
| uL05c   | P82192     |            | 1-220         | 16-194           |
| uL06c   | AOA0K9R4N9 | 1-220      | 39-220        | 40-217           |
| bL09c   | AOA0K9RQ91 | 1-196      | 42-196        | 43-87            |
| uL10c   | AOA0K9R3N5 | 1-232      | 53-232        |                  |
| uL11c   | P31164     | 1-224      | 67-224        |                  |
| bL12c   | P02398     | 1-189      | 57-189        |                  |
| uL13c   | P12629     | 1-250      | 48-250        | 55-250           |
| uL14c   | P09596     |            | 1-121         | 1-120            |
| uL15c   | AOA0K9QHT0 | 1-271      | 61-271        | 78-259           |
| uL16c   | P17353     |            | 1-135         | 1-135            |
| bL17c   | AOA0K9RLJ4 | 1-126      | 11-126        | 11-126           |
| uL18c   | AOA0K9QQ60 | 1-166      | 45-166        | 49-166           |
| bL19c   | P82413     | 1-233      | 78-233        | 117-230          |
| bL20c   | P28803     |            | 2-128         | 2-117            |
| bL21c   | P24613     | 1-256      | 56-256        | 101-234          |
| uL22c   | P09594     |            | 2-199         | 25-176           |
| uL23c   | Q9LWB5     | 1-198      | 77-198        | 104-194          |
| uL24c   | P27683     | 1-191      | 47-191        | 47-175           |
| bL27c   | AOA0K9R4I2 | 1-194      | 57-194        | 59-166           |
| bL28c   | AOA0K9RD02 | 1-148      | 72-148        | 72-146           |
| uL29c   | AOA0K9R7W8 | 1-168      | 59-168        | 59-152           |
| bL31c   | AOA0K9R0R6 | 1-130      | 37-130        |                  |
| bL32c   | P28804     | 1-57       | 2-57          | 2-43             |
| bL33c   | P28805     |            | 1-66          | 6-65             |
| bL34c   | P82244     | 1-152      | 92-152        | 92-152           |
| bL35c   | P23326     | 1-159      | 87-159        | 90-159           |
| bL36c   | P12230     |            | 1-37          | 1-37             |
| PSRP5   | P27684     | 1-142      | 59-142        | 97-142           |
| PSRP6   | P82411     | 1-116      | 48-116        | 48-94            |
| RRF     | P82231     |            | 1-271         | 89-114;191-271   |

## SUPPLEMENTARY REFERENCES

1. Kucukelbir, A., Sigworth, F.J. and Tagare, H.D. (2014) Quantifying the local resolution of cryo-EM density maps. *Nat. Methods*, **11**, 63-65.
2. Frank, J., Radermacher, M., Penczek, P., Zhu, J., Li, Y., Ladjadj, M. and Leith, A. (1996) SPIDER and WEB: processing and visualization of images in 3D electron microscopy and related fields. *J. Struct. Biol.*, **116**, 190-199.
3. Grigorieff, N. (2007) FREALIGN: high-resolution refinement of single particle structures. *J. Struct. Biol.*, **157**, 117-125.
4. Sharma, M.R., Wilson, D.N., Datta, P.P., Barat, C., Schluenzen, F., Fucini, P. and Agrawal, R.K. (2007) Cryo-EM study of the spinach chloroplast ribosome reveals the structural and functional roles of plastid-specific ribosomal proteins. *Proc. Natl. Acad. Sci. USA*, **104**, 19315-19320.
5. Jenner, L.B., Demeshkina, N., Yusupova, G. and Yusupov, M. (2010) Structural aspects of messenger RNA reading frame maintenance by the ribosome. *Nat. Struct. Mol. Biol.*, **17**, 555-560.
6. Polikanov, Y.S., Blaha, G.M. and Steitz, T.A. (2012) How hibernation factors RMF, HPF, and YfiA turn off protein synthesis. *Science*, **336**, 915-918.
7. Cannone, J.J., Subramanian, S., Schnare, M.N., Collett, J.R., D'Souza, L.M., Du, Y., Feng, B., Lin, N., Madabusi, L.V., Muller, K.M. *et al.* (2002) The comparative RNA web (CRW) site: an online database of comparative sequence and structure information for ribosomal, intron, and other RNAs. *BioMed Central Bioinformatics*, **3**, 2.
